# Supplementary material
Source: publisher site journal article supplement (https://www.dovepress.com/article/182699)
Supplement: Supplementary file 1 [file get_supplementary_file.php]

**Supplementary Materials**

**Grafting of multi-walled carbon nanotubes with pyrazole derivatives: characterization, antimicrobial activity and molecular docking study**

Nadia Hanafy Metwally1*, Gamal Riad Saad1and Esraa Azmy Abd El- Wahab2

*1Chemistry Department, Faculty of Science, Cairo University, Giza, Egypt*

*2Department of Engineering Mathematics and Physics, Faculty of Engineering Shoubra, Benha University.*


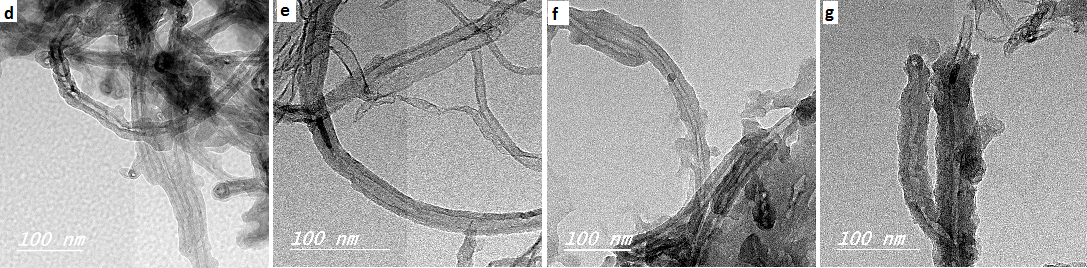


Figure S1. TEM micrographs of (d) CNTs (**1b**), (e) CNTs (**1c**), (f) CNTs (**2b**) and (g) CNTs (**2c**).


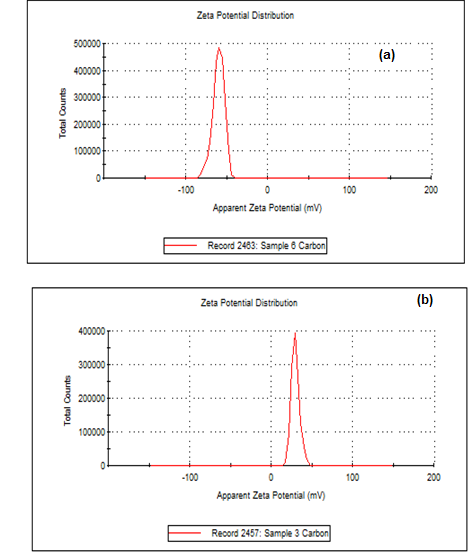


Figure S2. Examples of zeta potential distribution (ξ) in aqueous suspension (a) CNTs and (b) CNTs (**1c**).

**Molecular docking figures**


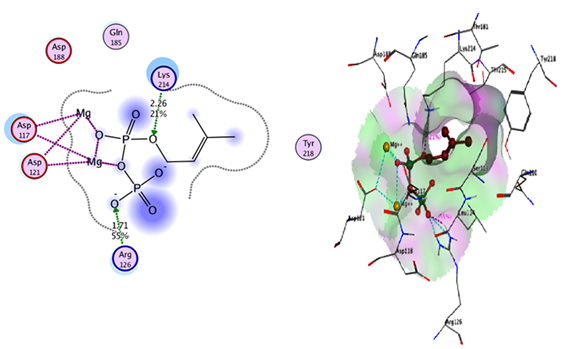


2D and 3D of the active site of 1UBY.


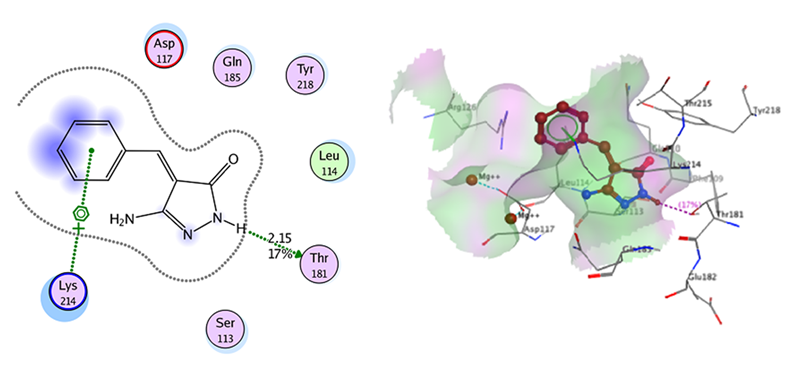


2D and 3D Lignad interaction of **2a** with the active site of 1UBY.


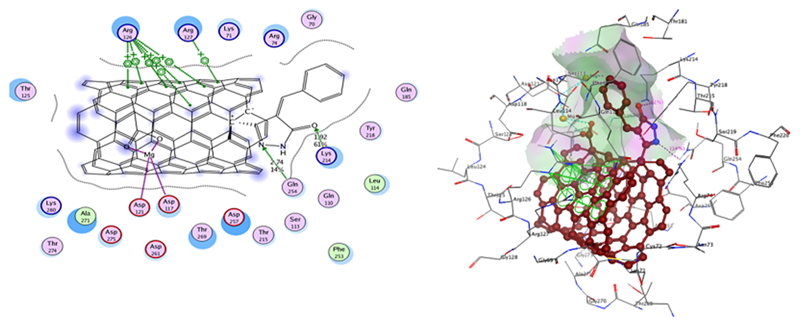


2D and3D Ligand interaction of CNTs-**2a** with the active site of 1UBY.
